# Supplementary material
Source: publisher figshare collection journal article supplement (https://aacr.figshare.com/ndownloader/files/39843729)

Supplementary Figure 5

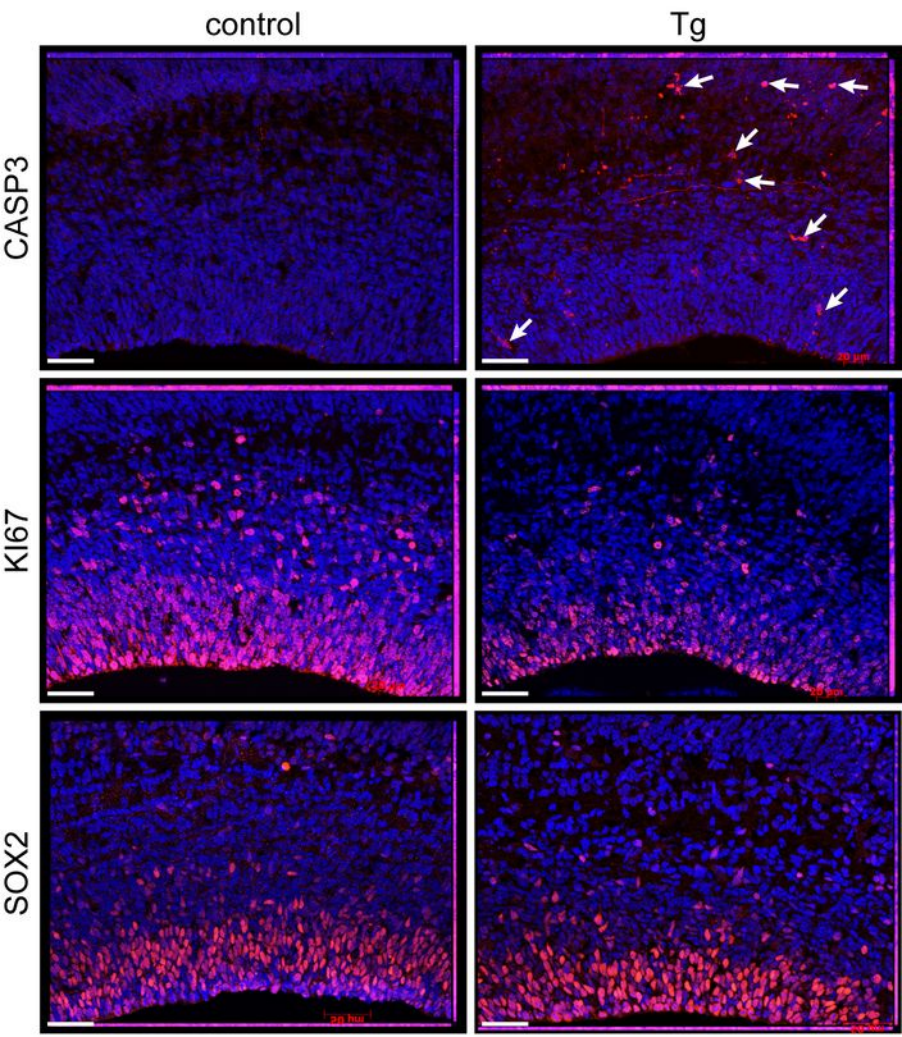

Supplement: Supplementary file 1 [file 39843729]
